1 **Public toilets have reduced enteric pathogen hazards in San Francisco**

2 Troy Barker<sup>1\*</sup>, Drew Capone<sup>2\*</sup>, Heather K. Amato<sup>3</sup>, Ryan Clark<sup>1</sup>, Abigail Henderson<sup>3</sup>, David A.  
3 Holcomb<sup>1</sup>, Elizabeth Kim<sup>1</sup>, Jillian Pape<sup>3</sup>, Emily Parker<sup>3</sup>, Thomas VanderYacht<sup>3</sup>, Jay Graham<sup>3</sup>,  
4 and Joe Brown<sup>1\*\*</sup>

5  
6 <sup>1</sup>Department of Environmental Sciences and Engineering, Gillings School of Global Public  
7 Health, University of North Carolina at Chapel Hill, Chapel Hill, NC, USA

8 <sup>2</sup>Department of Environmental and Occupational Health, School of Public Health, Indiana  
9 University Bloomington, Bloomington, IN, USA

10 <sup>3</sup>Department of Environmental Health, School of Public Health, University of California –  
11 Berkeley, Berkeley, CA, USA

12  
13 \*These authors contributed equally to the manuscript.

14  
15 \*\*Corresponding author: Joe Brown, Department of Environmental Sciences and Engineering,  
16 Gillings School of Global Public Health, University of North Carolina at Chapel Hill. CB7431  
17 Rosenau Hall, Chapel Hill, NC 27599-7431, USA. Tel: +1 919 360 8752. Email:  
18 [joebrown@unc.edu](mailto:joebrown@unc.edu)

19  
20 **KEYWORDS:** homelessness, urban sanitation, mtDNA, microbial hazards, environmental  
21 exposures, environmental microbiology, dPCR, qPCR

22

23 **SYNOPSIS:** This paper describes enteric pathogen hazards from discarded feces on the streets  
24 of San Francisco and estimates their reduction following a public toilet intervention.

25

26

27 **TOC/Abstract art:**

28 Created with BioRender and a photograph by author Jay Graham

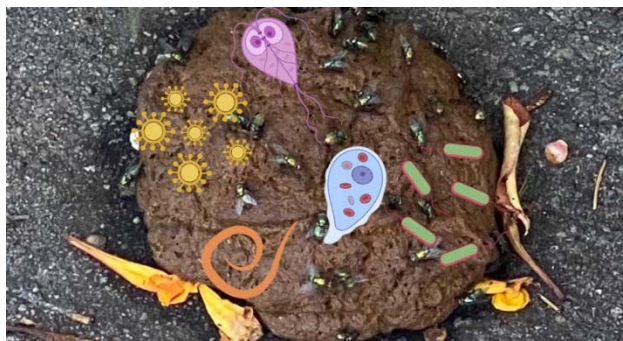

29

30

31 **ABSTRACT**

32 Uncontained fecal wastes in cities may present exposure risks to the public. We collected  
33 discarded feces from public spaces in San Francisco for analysis by RT-qPCR for a range of  
34 enteric pathogens. Out of 59 samples, we found 12 (20%) were of human origin and 47 (80%)  
35 were non-human; 30 of 59 stools were positive for  $\geq 1$  of the 35 pathogens assessed, including  
36 pathogenic *E. coli*, *Shigella*, norovirus, *Cryptosporidium*, and *Trichuris*. Using quantitative  
37 enteric pathogen estimates and data on observed fecal waste from a public reporting system, we  
38 modeled pathogens removed from the environment attributable to a recently implemented  
39 program of public toilet construction. We estimated that each new public toilet reduced the  
40 annual number of enteric pathogens released into the immediate environment (within 500 m  
41 walking distance), including  $6.3 \times 10^{12}$  enteropathogenic *E. coli* (95% CI:  $4.0 \times 10^{12} - 7.9 \times$

42  $10^{12}$ ),  $3.2 \times 10^{11}$  enteroaggregative *E. coli* (95% CI:  $1.3 \times 10^{11} - 6.3 \times 10^{11}$ ), and  $3.2 \times 10^8$   
43 *Shigella* ( $6.3 \times 10^7 - 2.5 \times 10^9$ ). Improving access to public sanitation can reduce enteric  
44 pathogen hazards in cities. Interventions must also consider the hygienic disposal of animal  
45 waste to reduce microbial hazards with zoonotic infection potential.

46

## 47 **INTRODUCTION**

48 People experiencing homelessness are more likely than the general population to suffer from  
49 communicable diseases<sup>1</sup>, partly because they lack consistent access to basic infrastructure  
50 including safe water and sanitation<sup>2, 3</sup>. Nearly one million persons in US cities have insufficient  
51 access to basic sanitation and over 600,000 cannot consistently access basic water infrastructure<sup>2</sup>,  
52 primarily those lacking stable housing.

53

54 Nearly 130,000 people in California experience homelessness each day, and they are  
55 disproportionately unsheltered compared to those in other states<sup>1, 4</sup>. Like many US cities, San  
56 Francisco does not have enough public toilets to meet demand<sup>5</sup>. Consistent access to sanitation  
57 and soap and water for proper handwashing is necessary to prevent the spread of enteric  
58 pathogens that may cause diarrheal disease<sup>6</sup>. Without safe, hygienic, and publicly accessible  
59 toilets when and where people need them, open defecation is common<sup>7-9</sup>. As a result,  
60 uncontained fecal waste can accumulate near where people live, work, and play, creating  
61 opportunities for exposure to enteric pathogens through well-known direct and indirect  
62 pathways<sup>10-13</sup>.

63

64 Fecal contamination on the streets of San Francisco is so common that the Department of Public  
65 Works (DPW) created a well-used system to report feces in public spaces, where instances of  
66 fecal waste can be reported by dialing 311 from a telephone (or, now, via a website or  
67 Twitter)<sup>11,14</sup>. Data since 2008 are publicly available at <https://datasf.org/opendata/>. As a step  
68 toward addressing the well-publicized problem, DPW implemented the Pit Stop program  
69 beginning in 2014, aiming to reduce open defecation in public spaces by installing staffed public  
70 toilets in areas of high need.<sup>11,12</sup> The intervention also includes animal waste bags and waste bins  
71 for disposal. A full description of the program and its history is available at the Pit Stop website:  
72 <https://sfpublicworks.wixsite.com/pitstop>. A recent impact assessment of the program estimated  
73 that the installation of public latrines reduced 311 reports of fecal waste on the street by a mean  
74 of 12.5 stools per week within 500 meters (walking distance) of newly installed Pit Stop  
75 locations in the six months following installation, compared with a pre-intervention baseline<sup>15</sup>.  
76 The greatest reduction in reports of fecal waste occurred in the Tenderloin neighborhood (i.e., 18  
77 stools per week per new facility), which had 10 public toilets, the most of any neighborhood in  
78 the program. The Tenderloin and South of Market (SoMa) had the highest counts of 311 reports  
79 in the study period; together, these neighborhoods make up District 6, which had the highest  
80 count of people experiencing homelessness (n=3,656) in SF as of 2019<sup>16</sup>. With only 3 Pit Stop  
81 public facilities in SoMa, there was no significant reduction of 311 reports associated with the Pit  
82 Stop intervention in this neighborhood. A recent independent analysis by the San Francisco  
83 Chronicle of 311 data concluded that, while feces-related service requests for every other  
84 neighborhood in San Francisco have gone up an average of 400% in the period from 2012-2021,  
85 reports for the Tenderloin reduced by 29%, with pronounced further decreases in the area  
86 immediately around three Pit Stop interventions<sup>14</sup>.

87

88 These interventions may affect exposures to enteric pathogen hazards to the public from human  
89 and animal fecal waste, including among people experiencing homelessness who may bear the  
90 greatest direct risks. Our primary aim was to estimate the degree to which Pit Stop interventions  
91 have reduced enteric pathogens in the immediate environment surrounding new toilet facilities.  
92 To this end, we: (1) conducted a systematic survey of discarded feces in a pre-defined area; (2)  
93 determined whether each fecal sample was of human or non-human origin; (3) quantified a range  
94 of enteric pathogens in recovered fecal samples, using molecular methods; and (4) used the  
95 intervention-attributable reduction in observed feces from 311 reports<sup>15</sup> to estimate reductions of  
96 the enteric pathogens we detected.

97

## 98 **MATERIALS AND METHODS**

99 A previous longitudinal study estimated that the installation of public toilets in two San  
100 Francisco neighborhoods resulted in a mean reduction of 18 stools per week within 500 meters  
101 (walking distance) of each facility<sup>15</sup>. We systematically collected discarded stools in this area  
102 and quantified a range of enteric pathogens in each sample. We used these data to model the  
103 reduction of pathogen hazards attributable to each facility.

104

105 **Sample Collection.** We used 311 reports of fecal waste in San Francisco, CA in August 2020 to  
106 identify hotspots for open defecation (OD) reports and design a systematic survey of discarded  
107 stools for enteric pathogen analysis. The available 311 data include reports of any discarded  
108 feces, including both suspected human and non-human fecal waste. The Tenderloin and SoMa  
109 neighborhoods had the highest number of 311 reports and were therefore selected for sampling;

110 we matched observed feces with 311 reports to verify that 311 data reliably indicated instances  
111 of fecal waste (Text S1). We prioritized 20 blocks, including both sidewalks on either side of the  
112 street for collection (Figure S1, Figure S2). We generated a perimeter around the selected blocks,  
113 with any block inside the perimeter potentially utilized if samples were not available on the 20  
114 selected blocks. We collected biospecimens on four Wednesday mornings in September and  
115 October of 2020 before street cleaning began. Stool samples were collected into one-liter  
116 biohazard bags and stored in a cooler with ice packs. We transferred samples into 1.5 mL  
117 cryotubes and stored them at -20°C within 4 hours of collection. Any confirmed animal stool  
118 (e.g., if the team observed an animal defecating) was not collected.

119  
120 **Sample preparation and analysis.** We used the QIAamp 96 Virus QIAcube HT Kit (Qiagen,  
121 Hilden, Germany) to extract nucleic acids from 100 mg of stool using a pre-treatment step  
122 previously validated for molecular detection of multiple enteric pathogens with both DNA and  
123 RNA genomes (Text S2)<sup>17, 18</sup>. We proceeded with extraction following the manufacturer's  
124 protocol for the QIAamp 96 Virus QIAcube HT Kit, which we automated on the QIAcube  
125 (Qiagen, Hilden, Germany). We measured the concentration of dsDNA using the dsDNA HS  
126 assay with a Qubit 4 Fluorometer (Invitrogen, Waltham, Massachusetts).

127  
128 We quantified human mitochondrial DNA (mtDNA) in each sample by dPCR to determine  
129 whether feces were of presumptive human origin (Text S5, Figure S3) using an assay that  
130 previously demonstrated 100% sensitivity and 97% specificity to human stool<sup>19</sup>. We normalized  
131 mtDNA gene copy estimates to ng of dsDNA, and compared results against values reported in  
132 the literature to categorize samples as human or non-human.<sup>19</sup> Positive and negative PCR

133 controls<sup>20</sup> were run each day of analysis via qPCR (Text S3) and dPCR (Text S5, Table S7). We  
134 developed and used custom TaqMan Array Cards (TAC) (Thermo Fisher Scientific, Waltham,  
135 MA) using published primer and probe sequences (Tables S2-S4) for a range of enteric bacteria,  
136 viruses, protozoa, helminths, and controls. TAC is a 384-well array card with 8 ports for loading  
137 samples and each 1.5  $\mu$ L well contains lyophilized primers and probes for the detection of pre-  
138 defined targets. We analyzed extracted nucleic acids via TAC on the QuantStudio 7, generating  
139 real-time RT-qPCR curves for each target for each sample (Text S3). Standard curve details and  
140 95% limits of detection are presented in Table S3. We visually compared exponential curves and  
141 multicomponent plots with positive control plots to validate positive amplification<sup>21, 22</sup>. We  
142 manually set thresholds to the point of inflection and considered targets amplifying at or below  
143 35 cycles positive<sup>23</sup>. We re-ran samples that did not amplify DNA/RNA extraction positive  
144 controls as expected at a 1:10 dilution, and samples that did not then amplify controls were  
145 excluded from analysis. We performed additional confirmatory analysis of samples positive for  
146 soil-transmitted helminths via microscopy using the mini-FLOTAC method (Text S4, Figure  
147 S4).<sup>16</sup> We transformed cycle quantification (Cq) values into gene copy concentrations per gram  
148 feces using pathogen-specific standard curves.

149  
150 **Stochastic model.** We estimated the annual number of pathogens diverted from the environment  
151 attributable to the Pit Stop intervention program using R version 4.1.0<sup>24</sup>. We transformed gene  
152 copies (gc) into genomic units (i.e., discrete pathogens) using published values for gene copies  
153 per genome (Table S5, model parameters)<sup>23</sup>. We treated non-detects as true zeroes. Using the  
154 `fitdistrplus` package in R<sup>25</sup>, we used maximum likelihood estimation (MLE) to fit log-normal  
155 distributions to the quantity of pathogens per gram of stool in fecal samples, obtaining separate

156 estimates of the mean and standard deviation of log-pathogens per gram of presumptively human  
157 and non-human stool, respectively, for each pathogen detected. We thus generated an estimated  
158 mean and standard deviation for the number of pathogens per gram of feces. However, we  
159 assigned upper bound thresholds to the distributions of pathogen concentrations in feces based  
160 on biological plausibility (i.e., bacteria:  $10^9$ /gram; viruses:  $10^{12}$ /gram; protozoa:  $10^7$ /gram;  
161 helminths:  $10^6$ /gram) and to prevent outliers in the distribution from driving the overall annual  
162 estimate. We modeled an estimate of 18 stools per week that were diverted from the  
163 environment<sup>15</sup> due to each new toilet facility across 52 weeks, because this was the reduction  
164 reported by Amato *et al.* 2022<sup>15</sup> for the Tenderloin and SOMA neighborhoods. Using a Monte  
165 Carlo Simulation, we applied a binomial distribution to estimate whether each unique diverted  
166 stool (of 18) contained a specific pathogen. For each stool simulated to contain a given pathogen,  
167 we estimated the concentration using the corresponding MLE-generated distribution. We fit a  
168 log-normal distribution to the mass of human defecation events reported in Cummings *et al.*  
169 1992 to stochastically estimate the mass of each stool<sup>26</sup>. For pathogens detected in only one of  
170 the collected samples, we used the number of pathogens per gram of stool for the single stool in  
171 place of an MLE-generated mean and the average MLE standard deviation from plurally  
172 detected pathogens (Table S5). We repeated the process 52 times to estimate pathogens reduced  
173 over a year. We then summed the number of estimated pathogens across the entire year to  
174 estimate the number of pathogens diverted annually, repeating the process 1000 times to generate  
175 95% confidence intervals.

176

## 177 **RESULTS**



178 We tested 60 stool samples, but excluded one whose assays lacked positive control  
179 amplification, leaving 59 samples for analysis. Positive controls exhibited consistent  
180 amplification (Cq~20) and no amplification was observed in our negative controls, except for the  
181 16S assay (Cq~35, Text S6), which is a known contaminant in mastermix containing the  
182 TaqMan polymerase<sup>27,28</sup>. Pathogen prevalence disaggregated by human mtDNA results is shown  
183 in Table 1; we determined that 12 samples were of human origin and 47 were from non-human  
184 sources. Out of 35 pathogens analyzed using TAC, 30/59 samples (51%) contained one or more  
185 pathogens, 21/59 (36%) contained two or more pathogens, 8/59 (14%) contained 3 or more  
186 pathogens, and 1/59 (2%) contained 5 pathogens. The most prevalent pathogens were atypical  
187 enteropathogenic *E. coli* (EPEC) at 37% (22/59), typical EPEC and *Acanthamoeba spp.* each at  
188 12% (7/59), *Cryptosporidium* at 8% (5/59), and *Giardia* at 7% (4/59).

189  
190 The mtDNA dPCR assay indicated 12 samples were likely human in origin and 47 were likely  
191 animal in origin (Figure S3). The prevalence of atypical EPEC was higher in human stools (42%)  
192 than in the non-human stools (36%). Typical EPEC, tied for second most abundant pathogen  
193 found, was absent in human stools, as were *Salmonella*, Norovirus, *Cryptosporidium*, *Giardia*,  
194 and *Balantidium coli*. The pathogens *Helicobacter pylori*, *Shigella spp./EIEC* (enteroinvasive  
195 *Escherichia coli*), *Plesiomonas shigelloides*, and *Yersinia enterocolitica* were only found in  
196 human fecal samples.

197  
198 Two samples were TAC-positive for *Trichuris*, one of which was presumptively of human  
199 origin. Due to a borderline initial Cq value (34.4), a negative microscopy result, and inhibited or  
200 negative results on subsequent TAC runs for *Trichuris* for this sample, we excluded the result in

201 our prevalence calculations. Microscopy for the other (non-human) *Trichuris*-positive sample  
202 revealed *Trichuris vulpis*, *Toxocara canis*, and hookworm ova (Figure S4).

203  
204 We estimated the annual number of pathogens prevented from release into the local environment  
205 as a result of each Pit Stop intervention under three scenarios (Table 2): (1) that fecal waste  
206 reduced was both human and animal, since Pit Stop interventions also include animal waste bags  
207 and bins (2) that all fecal waste reduced was of human origin; and (3) (i) that all fecal waste  
208 reduced was of animal origin. These results of the three scenarios were similar due to the high  
209 concentration of pathogen shedding in feces, except for the instances where we only detected a  
210 pathogen in human or non-human feces (e.g., *Cryptosporidium*) (Table 2). The estimated  
211 reduction in pathogens released to environment in the scenario that considered both fecal waste  
212 sources varied from  $1 \times 10^7$  (95% CI:  $1.6 \times 10^6$ ,  $1.3 \times 10^8$ ) for *Trichuris* to  $6.3 \times 10^{12}$  (95% CI:  
213  $4.0 \times 10^{12}$ ,  $7.9 \times 10^{12}$ ) for atypical enteropathogenic *E. coli*.

214  
215 Because the Pit Latrine intervention includes animal waste bags and bins, it is plausible that  
216 these facilities may also result in reductions in enteric pathogens observed only in animal feces,  
217 including EPEC (typical), *Salmonella* spp., norovirus, *Cryptosporidium* spp., *Giardia* spp.,  
218 *Balantidium coli*, and *Trichuris* spp. Assuming that the Pit Stop facilities reduce both human and  
219 animal feces in the same proportion that they appear in our fecal samples (20% human, 80%  
220 non-human), we estimate quantitative reductions of the broad range of pathogens represented  
221 across all samples (Table 2).

222  
223

224  
225  
226  
227  
228  
229

| Pathogen                                                                                                                                                                                                                                                                                                                                                                                                                                                                                                                                                             | All fecal samples (n=59) | Presumptively human <sup>e</sup> (n=12) | Presumptively non-human <sup>e</sup> (n=47) |
|----------------------------------------------------------------------------------------------------------------------------------------------------------------------------------------------------------------------------------------------------------------------------------------------------------------------------------------------------------------------------------------------------------------------------------------------------------------------------------------------------------------------------------------------------------------------|--------------------------|-----------------------------------------|---------------------------------------------|
| <b>Bacteria</b>                                                                                                                                                                                                                                                                                                                                                                                                                                                                                                                                                      |                          |                                         |                                             |
| EPEC <sup>a</sup> (atypical)                                                                                                                                                                                                                                                                                                                                                                                                                                                                                                                                         | 37%                      | 42%                                     | 36%                                         |
| EPEC <sup>a</sup> (typical)                                                                                                                                                                                                                                                                                                                                                                                                                                                                                                                                          | 12%                      | 0%                                      | 15%                                         |
| EAEC <sup>b</sup> (aaiC/aatA)                                                                                                                                                                                                                                                                                                                                                                                                                                                                                                                                        | 3%                       | 8%                                      | 2%                                          |
| ETEC <sup>c</sup> (LT/ST)                                                                                                                                                                                                                                                                                                                                                                                                                                                                                                                                            | 3%                       | 8%                                      | 2%                                          |
| <i>Helicobacter pylori</i>                                                                                                                                                                                                                                                                                                                                                                                                                                                                                                                                           | 3%                       | 17%                                     | 0%                                          |
| <i>Shigella spp./EIEC<sup>d</sup></i> (ipaH)                                                                                                                                                                                                                                                                                                                                                                                                                                                                                                                         | 2%                       | 8%                                      | 0%                                          |
| <i>Plesiomonas shigelloides</i>                                                                                                                                                                                                                                                                                                                                                                                                                                                                                                                                      | 2%                       | 8%                                      | 0%                                          |
| <i>Salmonella spp.</i>                                                                                                                                                                                                                                                                                                                                                                                                                                                                                                                                               | 2%                       | 0%                                      | 2%                                          |
| <i>Yersinia enterocolitica</i>                                                                                                                                                                                                                                                                                                                                                                                                                                                                                                                                       | 2%                       | 8%                                      | 0%                                          |
| <b>Virus</b>                                                                                                                                                                                                                                                                                                                                                                                                                                                                                                                                                         |                          |                                         |                                             |
| norovirus (GI/II)                                                                                                                                                                                                                                                                                                                                                                                                                                                                                                                                                    | 2%                       | 0%                                      | 2%                                          |
| <b>Protozoa</b>                                                                                                                                                                                                                                                                                                                                                                                                                                                                                                                                                      |                          |                                         |                                             |
| <i>Acanthamoeba spp.</i>                                                                                                                                                                                                                                                                                                                                                                                                                                                                                                                                             | 12%                      | 17%                                     | 11%                                         |
| <i>Cryptosporidium spp.</i>                                                                                                                                                                                                                                                                                                                                                                                                                                                                                                                                          | 8%                       | 0%                                      | 11%                                         |
| <i>Giardia spp.</i>                                                                                                                                                                                                                                                                                                                                                                                                                                                                                                                                                  | 7%                       | 0%                                      | 9%                                          |
| <i>Blastocystis spp.</i>                                                                                                                                                                                                                                                                                                                                                                                                                                                                                                                                             | 3%                       | 8%                                      | 2%                                          |
| <i>Balantidium coli</i>                                                                                                                                                                                                                                                                                                                                                                                                                                                                                                                                              | 2%                       | 0%                                      | 2%                                          |
| <b>Soil-transmitted helminth</b>                                                                                                                                                                                                                                                                                                                                                                                                                                                                                                                                     |                          |                                         |                                             |
| <i>Trichuris spp.</i>                                                                                                                                                                                                                                                                                                                                                                                                                                                                                                                                                | 2%                       | 0%                                      | 2%                                          |
| <sup>a</sup> Enteropathogenic <i>Escherichia coli</i><br><sup>b</sup> Enteroggregative <i>Escherichia coli</i><br><sup>c</sup> Enterotoxigenic <i>Escherichia coli</i><br><sup>d</sup> Enteroinvasive <i>E. coli</i><br><sup>e</sup> Classified based on the concentration of human mitochondrial DNA (Supporting Information, Text S5) <sup>19</sup>                                                                                                                                                                                                                |                          |                                         |                                             |
| Not detected in any sample: <i>Campylobacter jejuni/coli</i> , <i>Clostridium difficile</i> , <i>E. coli</i> O157:H7, astrovirus, rotavirus, sapovirus (I/II/IV/V), SARS-CoV-2, <i>Cystoisospora belli</i> , <i>Cyclospora cayetanensis</i> , <i>Enterocytozoon bieneusi</i> , <i>Encephalitozoon intestinalis</i> , <i>Entamoeba histolytica</i> , <i>Entamoeba spp.</i> , <i>Ancylostoma duodenale</i> , <i>Ascaris lumbricoides</i> , <i>Enterobius vermicularis</i> , <i>Hymenolepis nana</i> , <i>Necator americanus</i> , and <i>Strongyloides stercoralis</i> |                          |                                         |                                             |

230 **Table 1.** Prevalence of pathogens in collected stool samples.

231

232  
233  
234  
235  
236  
237  
238  
239  
240  
241  
242  
243

| Pathogen                               | All fecal samples (n=59) |                                                                           | Presumptively human <sup>e</sup><br>(n=12) |                                                                           | Presumptively non-human <sup>e</sup><br>(n=47) |                                                                           |
|----------------------------------------|--------------------------|---------------------------------------------------------------------------|--------------------------------------------|---------------------------------------------------------------------------|------------------------------------------------|---------------------------------------------------------------------------|
|                                        | prevalence               | median<br>(95% CI)                                                        | prevalence                                 | median<br>(95% CI)                                                        | prevalence                                     | median<br>(95% CI)                                                        |
| EPEC <sup>a</sup> (atypical)           | 22/59                    | 6.3x10 <sup>12</sup><br>(4.0x10 <sup>12</sup> ,<br>7.9x10 <sup>12</sup> ) | 5/12                                       | 6.3x10 <sup>12</sup><br>(5.0x10 <sup>12</sup> ,<br>7.9x10 <sup>12</sup> ) | 17/47                                          | 5.0x10 <sup>12</sup><br>(4.0x10 <sup>12</sup> ,<br>7.9x10 <sup>12</sup> ) |
| EPEC <sup>a</sup> (typical)            | 7/59                     | 1.0x10 <sup>11</sup><br>(4.0x10 <sup>10</sup> ,<br>2.5x10 <sup>11</sup> ) | 2/12                                       | 1.6x10 <sup>11</sup><br>(7.9x10 <sup>10</sup> ,<br>3.2x10 <sup>11</sup> ) | 5/47                                           | 1.0x10 <sup>11</sup><br>(4.0x10 <sup>10</sup> ,<br>2.5x10 <sup>11</sup> ) |
| <i>Acanthamoeba</i> spp.               | 7/59                     | 7.9x10 <sup>6</sup><br>(6.3x10 <sup>6</sup> ,<br>1.0x10 <sup>7</sup> )    | 1/12                                       | 5.0x10 <sup>6</sup><br>(4.0x10 <sup>6</sup> ,<br>7.9x10 <sup>6</sup> )    | 6/47                                           | 7.9x10 <sup>6</sup><br>(6.3x10 <sup>6</sup> ,<br>1.0x10 <sup>7</sup> )    |
| <i>Cryptosporidium</i> spp.            | 5/59                     | 1.6x10 <sup>10</sup><br>(1.0x10 <sup>10</sup> ,<br>2.5x10 <sup>10</sup> ) | 0/12                                       | 0                                                                         | 5/47                                           | 2.0x10 <sup>10</sup><br>(1.3x10 <sup>10</sup> ,<br>3.2x10 <sup>10</sup> ) |
| <i>Blastocystis</i> spp.               | 2/59                     | 5.0x10 <sup>11</sup><br>(1.3x10 <sup>11</sup> ,<br>1.0x10 <sup>12</sup> ) | 1/12                                       | 1.3x10 <sup>12</sup><br>(6.3x10 <sup>11</sup> ,<br>2.0x10 <sup>12</sup> ) | 1/47                                           | 3.2x10 <sup>11</sup><br>(4.0x10 <sup>10</sup> ,<br>7.9x10 <sup>11</sup> ) |
| <i>Giardia</i> spp.                    | 4/59                     | 4.0x10 <sup>9</sup><br>(1.6x10 <sup>9</sup> ,<br>7.9x10 <sup>9</sup> )    | 0/12                                       | 0                                                                         | 4/47                                           | 5.0x10 <sup>9</sup><br>(2.0x10 <sup>9</sup> ,<br>7.9x10 <sup>9</sup> )    |
| EAEC <sup>b</sup>                      | 2/59                     | 3.2x10 <sup>11</sup><br>(1.3x10 <sup>11</sup> ,<br>6.3x10 <sup>11</sup> ) | 1/12                                       | 7.9x10 <sup>11</sup><br>(5.0x10 <sup>11</sup> ,<br>1.3x10 <sup>12</sup> ) | 1/47                                           | 2.0x10 <sup>11</sup><br>(6.3x10 <sup>10</sup> ,<br>4.0x10 <sup>11</sup> ) |
| ETEC <sup>c</sup>                      | 2/59                     | 2.5x10 <sup>7</sup><br>(1.3x10 <sup>7</sup> ,<br>4.0x10 <sup>7</sup> )    | 1/12                                       | 4.0x10 <sup>7</sup><br>(3.2x10 <sup>7</sup> ,<br>7.9x10 <sup>7</sup> )    | 1/47                                           | 1.6x10 <sup>7</sup><br>(6.3x10 <sup>6</sup> ,<br>2.5x10 <sup>7</sup> )    |
| <i>Helicobacter pylori</i>             | 2/59                     | 7.9x10 <sup>8</sup><br>(4.0x10 <sup>8</sup> ,<br>1.3x10 <sup>9</sup> )    | 0/12                                       | 0                                                                         | 2/47                                           | 1.0x10 <sup>9</sup><br>(6.3x10 <sup>8</sup> ,<br>1.6x10 <sup>9</sup> )    |
| <i>Shigella</i> spp./EIEC <sup>d</sup> | 1/59                     | 3.2x10 <sup>8</sup><br>(6.3x10 <sup>7</sup> ,<br>2.5x10 <sup>9</sup> )    | 1/12                                       | 2.0x10 <sup>9</sup><br>(1.0x10 <sup>9</sup> ,<br>6.3x10 <sup>9</sup> )    | 0/47                                           | 0                                                                         |
| <i>Plesiomonas shigelloides</i>        | 1/59                     | 3.2x10 <sup>9</sup><br>(6.3x10 <sup>8</sup> ,<br>2.5x10 <sup>10</sup> )   | 0/12                                       | 0                                                                         | 1/47                                           | 5.0x10 <sup>9</sup><br>(1.3x10 <sup>9</sup> ,<br>3.2x10 <sup>10</sup> )   |
| <i>Salmonella</i> spp.                 | 1/59                     | 1.0x10 <sup>9</sup><br>(2.5x10 <sup>8</sup> ,                             | 0/12                                       | 0                                                                         | 1/47                                           | 1.6x10 <sup>9</sup><br>(3.2x10 <sup>8</sup> ,                             |

|                                                                                                                                                                                                                                                                                                                                                        |      |                                                                          |      |                                                                           |      |                                                                         |
|--------------------------------------------------------------------------------------------------------------------------------------------------------------------------------------------------------------------------------------------------------------------------------------------------------------------------------------------------------|------|--------------------------------------------------------------------------|------|---------------------------------------------------------------------------|------|-------------------------------------------------------------------------|
|                                                                                                                                                                                                                                                                                                                                                        |      | 6.3x10 <sup>9</sup> )                                                    |      |                                                                           |      | 7.9x10 <sup>9</sup> )                                                   |
| <i>Yersinia enterocolitica</i>                                                                                                                                                                                                                                                                                                                         | 1/59 | 1.6x10 <sup>10</sup><br>(3.2x10 <sup>9</sup> ,<br>1.0x10 <sup>11</sup> ) | 1/12 | 1.0x10 <sup>11</sup><br>(4.0x10 <sup>11</sup> ,<br>2.5x10 <sup>11</sup> ) | 0/47 | 0                                                                       |
| norovirus (GI/II)                                                                                                                                                                                                                                                                                                                                      | 1/59 | 4.0x10 <sup>8</sup><br>(7.9x10 <sup>7</sup> ,<br>3.2x10 <sup>9</sup> )   | 0/12 | 0                                                                         | 1/47 | 6.3x10 <sup>8</sup><br>(1.3x10 <sup>8</sup> ,<br>4.0x10 <sup>9</sup> )  |
| <i>Balantidium coli</i>                                                                                                                                                                                                                                                                                                                                | 1/59 | 2.5x10 <sup>9</sup><br>(5.0x10 <sup>8</sup> ,<br>1.6x10 <sup>10</sup> )  | 0/12 | 0                                                                         | 1/47 | 4.0x10 <sup>9</sup><br>(7.9x10 <sup>8</sup> ,<br>2.0x10 <sup>10</sup> ) |
| <i>Trichuris</i> spp.                                                                                                                                                                                                                                                                                                                                  | 1/59 | 1.0x10 <sup>7</sup><br>(1.6x10 <sup>6</sup> ,<br>1.3x10 <sup>8</sup> )   | 0/12 | 0                                                                         | 1/47 | 1.6x10 <sup>7</sup><br>(2.5x10 <sup>6</sup> ,<br>1.3x10 <sup>8</sup> )  |
| <sup>a</sup> Enteropathogenic <i>Escherichia coli</i><br><sup>b</sup> Enteroadgregative <i>Escherichia coli</i><br><sup>c</sup> Enterotoxigenic <i>Escherichia coli</i><br><sup>d</sup> Enteroinvasive <i>E. coli</i><br><sup>e</sup> Classified based on the concentration of human mitochondrial DNA (Supporting Information, Text S5) <sup>19</sup> |      |                                                                          |      |                                                                           |      |                                                                         |

244 **Table 2.** Modeled annual pathogens prevented from release into the environment per Pit Stop in  
 245 study area (within 500 m walking distance).  
 246

247  
 248

## 249 DISCUSSION

250 We detected a wide range of enteric pathogens in the fecal samples we collected, with  
 251 approximately half (51%) of all samples positive for one or more of the pathogens we sought.  
 252 Based on our pathogen analysis of fecal wastes and previously estimated reductions in fecal  
 253 wastes on the street<sup>15</sup>, the Pit Stop intervention has likely reduced the number of pathogens  
 254 released into the environment within 500 m walking distance of each new toilet facility installed.  
 255 Reducing pathogen hazards in a densely populated environment can prevent disease  
 256 transmission, especially for the most vulnerable population: people experiencing homelessness,  
 257 particularly unsheltered people living in the study area who previously lacked accessible public  
 258 sanitation and hygiene facilities.

259

260 Four out of five samples were non-human in origin, with *Giardia*, *Cryptosporidium*, and EPEC  
 261 (typical) occurring only in animal stools, though each of these has zoonotic potential<sup>12, 29</sup>.

262 Microscopy results also revealed a high burden of helminth infection in a presumptive canine  
263 sample. Humans are not the definitive host of *Toxocara* and canine hookworm, but humans can  
264 be infected by them<sup>30, 31</sup>. While provision of public toilets has the potential to reduce human open  
265 defecation, control of animal feces requires different interventions. Although the Pit Stop  
266 intervention included animal waste bag distribution and disposal bins, further measures are  
267 probably required, including public education, enforcement, environmental controls, or other  
268 measures. Stray or feral animals may also contribute fecal waste. Based on our detection of a  
269 range of potentially zoonotic enteric pathogens in non-human fecal waste with the potential for  
270 human contact, control of animal feces should be considered in this setting<sup>12, 29</sup>.

271  
272 Our findings should be considered alongside some limitations and caveats. First, though we  
273 tested for a range of important enteric pathogens, we selected these targets *a priori* and they are a  
274 subset of pathogens that may be relevant in this context, especially considering the widespread  
275 presence of non-human fecal wastes. Other potential zoonoses, including *Toxoplasma gondii*,  
276 *Toxocara*, and canine hookworm may have been present and future studies should consider  
277 them<sup>12, 29</sup>. Second, the frequency of detection of these pathogens cannot be assumed to represent  
278 prevalence of infection in any population: multiple fecal samples in the study area may well have  
279 been from a single individual, and our quantitative estimations are based on a limited number of  
280 samples. Third, detection of pathogen-associated nucleic acids does not and cannot indicate  
281 viability or infectivity. These data cannot be used directly in assessing risk of exposure, without  
282 further assumptions beyond the scope of our analysis. Fecal samples were apparently fresh when  
283 sampled, but pathogens can be inactivated in the environment. Fourth, even without public  
284 toilets, many discarded stools will go on to be collected and safely disposed of through street and

285 sidewalk cleaning, being effectively removed from the environment and therefore unlikely to  
286 result in exposure. For this reason and others, we cannot conclude that the reduction in pathogen  
287 hazards associated with feces would necessarily result in changes to human exposures, infection,  
288 or disease, only that the potential exists.

289

290 Fifth, we treated non-detects on TAC as true zeroes, so our estimates might be conservative  
291 given the lower limit of detection for targets using these assays (Table S3). While TAC uses the  
292 same highly sensitive and specific probe-based RT-qPCR chemistry that has been widely  
293 adopted for pathogen detection and quantification in both clinical and research settings across a  
294 range of sample matrices, the physical constraints of the platform result in much smaller reaction  
295 volumes (~1.5  $\mu\text{L}$ ) than for traditional tube-based approaches (20  $\mu\text{L}$  – 50  $\mu\text{L}$ ). The reduced  
296 reaction volume may negatively impact analytical sensitivity (i.e., increase the probability of  
297 false negatives at low target concentrations) and likewise increase the variability of estimated  
298 target quantities at lower concentrations. However, TAC has previously been shown to compare  
299 favorably with traditional qPCR approaches in terms of quantification linearity as well as  
300 pathogen-specific sensitivity and specificity in stool samples<sup>21, 23, 32</sup>. We observed similar  
301 linearity of quantification with our standard curves for all but two assays, which were excluded  
302 from the analysis (Table S3), suggesting that our estimated pathogen gene copy concentrations in  
303 positive samples were sufficiently reliable for the purposes of parametrizing the log-normal  
304 pathogen concentration distributions (which operate on the scale of order-of-magnitude  
305 differences in pathogen quantity) we employed in our stochastic models.

306

307 Finally, in our quantitative model estimating pathogen reductions attributable to the Pit Stop  
308 intervention, we assumed that our stool samples (their pathogen content over time, and  
309 human/animal origin) are representative of the fecal wastes reduced due to public toilet  
310 construction. This may or may not be the case. Our samples were from a narrow window in time,  
311 when some pathogens may be more prevalent than others, and this may not be representative of  
312 what is being shed over time in the populations contributing fecal wastes to the streets in our  
313 study area. We assumed a mean reduction of 18 instances of OD within 500 meters of newly  
314 installed Pit Stop locations<sup>15</sup> in our study area, per week, throughout the modeled period of one  
315 year based on six months of observational data. We first estimated reductions in pathogen  
316 hazards assuming all contained waste was of human origin, given the Pit Stop's primary  
317 ostensible role in serving people. We also estimated hazard reductions based on enteric pathogen  
318 quantification across all samples, which from our collection effort were determined to be 20%  
319 human origin and 80% animal origin. The Pit Stop interventions included both toilet facilities as  
320 well as bags and bins for animal waste control, so both types of stools could plausibly be reduced  
321 in the immediate surroundings. We observed differences between pathogens detected according  
322 to presumptive human versus animal sources, with some pathogens appearing in only human  
323 stools and others occurring in non-human stool only. For example, *Helicobacter pylori* and  
324 *Shigella*/EIEC were detected only in presumptively human stools.

325  
326 Clean water, safe sanitation, and adequate hygiene are not universal in American cities<sup>2, 33, 34</sup>,  
327 with gaps most apparent among those experiencing homelessness<sup>2, 7</sup>. San Francisco deserves  
328 credit for proactively working to solve this problem, which is not inexpensive<sup>14, 15</sup> and can be  
329 politically contentious as cities grapple with the growing crisis of homelessness. Water and



330 sanitation are human rights<sup>35</sup> that are essential to living a dignified life. Construction of publicly  
331 accessible, safe toilets is a commonsense approach to reducing enteric pathogen hazards in  
332 cities<sup>9</sup>, though the primary reason to continue to invest in public sanitation facilities is to support  
333 the physical, mental, and social well-being of people – much of which is difficult or impossible  
334 to measure in practice – and because it is the right and humane thing to do. Moreover, sanitation  
335 is a biological necessity that is needed wherever people live. The waste must go somewhere: an  
336 adult weighing 80 kg (near the mean body mass in North America) will produce an average of  
337 approximately 38 kg of feces per year<sup>36, 37</sup>, 100% of which should be effectively and safely  
338 managed to protect all members of the community from infectious disease. Cities should also  
339 consider interventions aimed at reducing animal feces, which are an underappreciated source of  
340 enteric pathogen hazards in urban spaces. Our findings demonstrate that a wide range of  
341 pathogens with zoonotic potential may be present in discarded animal waste, with uncertain  
342 implications for human exposure and disease transmission.

343

344

## 345 REFERENCES

- 346 1. Fazel, S.; Geddes, J. R.; Kushel, M., The health of homeless people in high-income countries:  
347 descriptive epidemiology, health consequences, and clinical and policy recommendations. *Lancet* **2014**,  
348 *384*, (9953), 1529-40.
- 349 2. Capone, D.; Cumming, O.; Nichols, D.; Brown, J., Water and Sanitation in Urban America, 2017–  
350 2019. *American Journal of Public Health* **2020**, *110*, (10), 1567-1572.
- 351 3. Yin, S.; Barker, L.; Ly, K. N.; Kilmer, G.; Foster, M. A.; Drobeniuc, J.; Jiles, R. B., Susceptibility to  
352 Hepatitis A Virus Infection in the United States, 2007-2016. *Clin Infect Dis* **2020**, *71*, (10), e571-e579.
- 353 4. Liu, C. Y.; Chai, S. J.; Watt, J. P., Communicable disease among people experiencing  
354 homelessness in California. *Epidemiol Infect* **2020**, *148*, e85.
- 355 5. Park, Y. S.; Bliss, D. Z., Availability of Public Toilets in Parks and Recreational Sites in Selected US  
356 Cities. *Journal of Wound Ostomy & Continence Nursing* **2019**, *46*, (3), 235-239.
- 357 6. Bartram, J.; Cairncross, S., Hygiene, sanitation, and water: forgotten foundations of health. *PLoS*  
358 *Med* **2010**, *7*, (11), e1000367.

- 359 7. Capone, D.; Ferguson, A.; Gribble, M. O.; Brown, J., Open Defecation Sites, Unmet Sanitation  
360 Needs, and Potential Sanitary Risks in Atlanta, Georgia, 2017–2018. *American Journal of Public Health*  
361 **2018**, *108*, (9), 1238-1240.
- 362 8. Frye, E. A., Capone, D., and Evans, D.P., Open Defecation in the United States: Perspectives from  
363 the Streets. *Environmental Justice* **2019**, *12*, (5), 226-230.
- 364 9. Moreira, F. D.; Rezende, S.; Passos, F., On-street toilets for sanitation access in urban public  
365 spaces: A systematic review. *Utilities Policy* **2021**, *70*, 101186.
- 366 10. Brown, J.; Cairncross, S.; Ensink, J. H., Water, sanitation, hygiene and enteric infections in  
367 children. *Arch Dis Child* **2013**, *98*, (8), 629-34.
- 368 11. Ginn, O.; Rocha-Melogno, L.; Bivins, A.; Lowry, S.; Cardelino, M.; Nichols, D.; Tripathi, S. N.; Soria,  
369 F.; Andrade, M.; Bergin, M.; Deshusses, M. A.; Brown, J., Detection and Quantification of Enteric  
370 Pathogens in Aerosols Near Open Wastewater Canals in Cities with Poor Sanitation. *Environ Sci Technol*  
371 **2021**, *55*, (21), 14758-14771.
- 372 12. Penakalapati, G.; Swarthout, J.; Delahoy, M. J.; McAliley, L.; Wodnik, B.; Levy, K.; Freeman, M. C.,  
373 Exposure to Animal Feces and Human Health: A Systematic Review and Proposed Research Priorities.  
374 *Environ Sci Technol* **2017**, *51*, (20), 11537-11552.
- 375 13. Wagner, E. G.; Lanoix, J. N., Excreta disposal for rural areas and small communities. *Monogr Ser*  
376 *World Health Organ* **1958**, *39*, 1-182.
- 377 14. Rezal, A., Poop complaints have swelled in all San Francisco neighborhoods — except this one.  
378 *San Francisco Chronicle* 23 August 2022, 2022.
- 379 15. Amato, H. K.; Martin, D.; Hoover, C. M.; Graham, J. P., Somewhere to go: assessing the impact of  
380 public restroom interventions on reports of open defecation in San Francisco, California from 2014 to  
381 2020. *BMC Public Health* **2022**, *22*, (1), 1673.
- 382 16. Research, A. S. *San Francisco Homeless Count & Survey Comprehensive Report*;  
383 [www.appliedsurveyresearch.org](http://www.appliedsurveyresearch.org): San Jose, California, 2019; p 76 pages.
- 384 17. Capone, D.; Berendes, D.; Cumming, O.; Knee, J.; Nalá, R.; Risk, B. B.; Stauber, C.; Zhu, K.; Brown,  
385 J., Analysis of Fecal Sludges Reveals Common Enteric Pathogens in Urban Maputo, Mozambique.  
386 *Environmental Science & Technology Letters* **2020**, *7*, (12), 889-895.
- 387 18. Knee, J.; Sumner, T.; Adriano, Z.; Anderson, C.; Bush, F.; Capone, D.; Casmo, V.; Holcomb, D.;  
388 Kolsky, P.; MacDougall, A.; Molotkova, E.; Braga, J. M.; Russo, C.; Schmidt, W. P.; Stewart, J.; Zambrana,  
389 W.; Zuin, V.; Nalá, R.; Cumming, O.; Brown, J., Effects of an urban sanitation intervention on childhood  
390 enteric infection and diarrhea in Maputo, Mozambique: A controlled before-and-after trial. *eLife* **2021**,  
391 *10*, e62278.
- 392 19. Zhu, K.; Suttner, B.; Pickering, A.; Konstantinidis, K. T.; Brown, J., A novel droplet digital PCR  
393 human mtDNA assay for fecal source tracking. *Water Res* **2020**, *183*, 116085.
- 394 20. Borchardt, M. A.; Boehm, A. B.; Salit, M.; Spencer, S. K.; Wigginton, K. R.; Noble, R. T., The  
395 Environmental Microbiology Minimum Information (EMMI) Guidelines: qPCR and dPCR Quality and  
396 Reporting for Environmental Microbiology. *Environmental Science & Technology* **2021**, *55*, (15), 10210-  
397 10223.
- 398 21. Lappan, R.; Henry, R.; Chown, S. L.; Luby, S. P.; Higginson, E. E.; Bata, L.; Jirapanjwat, T.; Schang,  
399 C.; Openshaw, J. J.; O'Toole, J.; Lin, A.; Tela, A.; Turagabeci, A.; Wong, T. H. F.; French, M. A.; Brown, R.  
400 R.; Leder, K.; Greening, C.; McCarthy, D., Monitoring of diverse enteric pathogens across environmental  
401 and host reservoirs with TaqMan array cards and standard qPCR: a methodological comparison study.  
402 *Lancet Planet Health* **2021**, *5*, (5), e297-e308.
- 403 22. Lappan, R.; Jirapanjwat, T.; Williamson, D. A.; Lange, S.; Chown, S. L.; Greening, C.,  
404 Simultaneous detection of multiple pathogens with the TaqMan Array Card. *MethodsX* **2022**, *9*, 101707.
- 405 23. Liu, J.; Gratz, J.; Amour, C.; Nshama, R.; Walongo, T.; Maro, A.; Mduma, E.; Platts-Mills, J.;  
406 Boisen, N.; Nataro, J.; Haverstick, D. M.; Kabir, F.; Lertsethtakarn, P.; Silapong, S.; Jeamwattanalert, P.;

- 407 Bodhidatta, L.; Mason, C.; Begum, S.; Haque, R.; Praharaj, I.; Kang, G.; Houpt, E. R., Optimization of  
408 Quantitative PCR Methods for Enteropathogen Detection. *PLOS ONE* **2016**, *11*, (6), e0158199.
- 409 24. Team, R. C., R: A language and environment for statistical computing (Version 4.0. 5)[Computer  
410 software]. *R Foundation for Statistical Computing* **2021**.
- 411 25. Delignette-Muller, M. L.; Dutang, C., fitdistrplus: An R Package for Fitting Distributions. *Journal*  
412 *of Statistical Software* **2015**, *64*, (4), 1 - 34.
- 413 26. Cummings, J. H.; Bingham, S. A.; Heaton, K. W.; Eastwood, M. A., Fecal weight, colon cancer risk,  
414 and dietary intake of nonstarch polysaccharides (dietary fiber). *Gastroenterology* **1992**, *103*, (6), 1783-9.
- 415 27. Corless, C. E.; Guiver, M.; Borrow, R.; Edwards-Jones, V.; Kaczmarek, E. B.; Fox, A. J.,  
416 Contamination and sensitivity issues with a real-time universal 16S rRNA PCR. *J Clin Microbiol* **2000**, *38*,  
417 (5), 1747-52.
- 418 28. Philipp, S.; Huemer, H. P.; Irschick, E. U.; Gassner, C., Obstacles of Multiplex Real-Time PCR for  
419 Bacterial 16S rDNA: Primer Specificity and DNA Decontamination of Taq Polymerase. *Transfus Med*  
420 *Hemother* **2010**, *37*, (1), 21-28.
- 421 29. Prendergast, A. J.; Gharpure, R.; Mor, S.; Viney, M.; Dube, K.; Lello, J.; Berger, C.; Siwila, J.;  
422 Joyeux, M.; Hodobo, T.; Hurt, L.; Brown, T.; Hoto, P.; Tavengwa, N.; Mutasa, K.; Craddock, S.; Chasekwa,  
423 B.; Robertson, R. C.; Evans, C.; Chidhanguro, D.; Mutasa, B.; Majo, F.; Smith, L. E.; Hirai, M.; Ntozini, R.;  
424 Humphrey, J. H.; Berendes, D., Putting the "A" into WaSH: a call for integrated management of water,  
425 animals, sanitation, and hygiene. *Lancet Planet Health* **2019**, *3*, (8), e336-e337.
- 426 30. Borg, O. A.; Woodruff, A. W., Prevalence of infective ova of *Toxocara* species in public places. *Br*  
427 *Med J* **1973**, *4*, (5890), 470-2.
- 428 31. Woodruff, A. W., Toxocariasis. *British Medical Journal* **1970**, *3*, (5724), 663-669.
- 429 32. Liu, J.; Gratz, J.; Amour, C.; Kibiki, G.; Becker, S.; Janaki, L.; Verweij, J. J.; Taniuchi, M.; Sobuz, S.  
430 U.; Haque, R.; Haverstick, D. M.; Houpt, E. R., A laboratory-developed TaqMan Array Card for  
431 simultaneous detection of 19 enteropathogens. *J Clin Microbiol* **2013**, *51*, (2), 472-80.
- 432 33. Mueller, J. T.; Gasteyer, S., The widespread and unjust drinking water and clean water crisis in  
433 the United States. *Nature Communications* **2021**, *12*, (1), 3544.
- 434 34. Meehan, K.; Jurjevich, J. R.; Chun, N. M. J. W.; Sherrill, J., Geographies of insecure water access  
435 and the housing&#x2013;water nexus in US cities. *Proceedings of the National Academy of Sciences*  
436 **2020**, *117*, (46), 28700-28707.
- 437 35. Nations, U., The Human Rights to Safe Drinking Water and Sanitation: Resolution In Council, H.  
438 R., Ed. UN General Assembly: 2018.
- 439 36. Berendes, D. M.; Yang, P. J.; Lai, A.; Hu, D.; Brown, J., Estimation of global recoverable human  
440 and animal faecal biomass. *Nature Sustainability* **2018**, *1*, (11), 679-685.
- 441 37. Yang, P. J.; LaMarca, M.; Kaminski, C.; Chu, D. I.; Hu, D. L., Hydrodynamics of defecation. *Soft*  
442 *Matter* **2017**, *13*, (29), 4960-4970.
- 443
